# Supplementary material
Source: publisher figshare collection journal article supplement (https://acs.figshare.com/ndownloader/files/4142173)
Supplement: Supplementary file 1 [file 4142173]

## **Supporting Information**

### **Active Ruthenium Catalysts Based on Phosphine-modified Ru/CeO<sub>2</sub> for the Selective Addition of Carboxylic Acids to Terminal Alkynes**

Masami Nishiumi, Hiroki Miura, Kenji Wada,\* Saburo Hosokawa, and Masashi Inoue

Department of Energy and Hydrocarbon Chemistry, Graduate School of Engineering,

Kyoto University, Katsura, Nishikyo-ku, Kyoto 615-8510, JAPAN

Phone +81-75-383-2482, Fax +81-75-383-2479,

e-mail: wadaken@scl.kyoto-u.ac.jp

## 1. Characterization of the supported ruthenium catalysts by nitrogen gas adsorption.

BET surface areas of representative supported catalysts used in the present study were calculated based on the nitrogen adsorption isotherms, and the results are summarized in Table S1. The ceria-supported catalysts showed typical type IV nitrogen adsorption/desorption isotherms, which reflected their mesoporous nature.

**Table S1.** BET surface area of supported Ru catalysts

| Entry | Sample <sup>[a]</sup>             | BET surface area (m <sup>2</sup> /g) |
|-------|-----------------------------------|--------------------------------------|
| 1     | Ru/CeO <sub>2</sub>               | 102                                  |
| 2     | Ru/ZrO <sub>2</sub>               | 82                                   |
| 3     | Ru/MgO                            | 148                                  |
| 4     | Ru/TiO <sub>2</sub>               | 50                                   |
| 5     | Ru/Al <sub>2</sub> O <sub>3</sub> | 142                                  |
| 6     | Ru/SiO <sub>2</sub>               | 269                                  |
| 7     | CeO <sub>2</sub>                  | 86                                   |

<sup>[a]</sup> Ru(acac)<sub>3</sub> was used as a Ru precursor.

## 2. Effects of phosphines for the modification of Ru/CeO<sub>2</sub>.

The effects of phosphines used for modification on the yields and selectivity of adducts were examined (Table S2). Among the phosphines examined, dppb was found to be the most suitable for the selective preparation of **Z-3aa** (entry 5). Note that the suitable amount of dppb for the modification of Ru/CeO<sub>2</sub> is 2 to 3 equivalents (molar base) to Ru. Although catalysts modified with PPh<sub>2</sub>(CH<sub>2</sub>)<sub>3</sub>PPh<sub>2</sub> (dppp) or PPh<sub>2</sub>(CH<sub>2</sub>)<sub>5</sub>PPh<sub>2</sub> (dpppe) showed high selectivities for **Z-3aa**, the yields were quite low (entries 4 and 6). On the other hand, Ru/CeO<sub>2</sub> catalysts modified with 1,1-bis(diphenylphosphino)methane (dppm), P(<sup>n</sup>Bu)<sub>3</sub>, or P(<sup>n</sup>Oct)<sub>3</sub> afforded **4aa**, the Markovnikov adduct, as a major product (entries 2, 8 and 9). Modification by other phosphines, PPh<sub>3</sub>, *rac*-BINAP, and 1,2-bis(diphenylphosphino)ethane (dppe) completely suppressed the activity under the present conditions (entries 1, 3 and 7).

**Table S2.** Effects of phosphines for the modification of Ru/CeO<sub>2</sub>.<sup>[a,b]</sup>

| Entry            | Phosphine                         | Total yield (%) <sup>[c]</sup> | Selectivity (%) <sup>[d]</sup><br><b>Z-3aa : E-3aa : 4aa</b> |
|------------------|-----------------------------------|--------------------------------|--------------------------------------------------------------|
| 1                | PPh <sub>3</sub>                  | trace                          | —                                                            |
| 2                | dppm                              | 68                             | 26 : 8 : 66                                                  |
| 3                | dppe                              | 0                              | —                                                            |
| 4                | dppp                              | 7                              | 86 : 14 : 0                                                  |
| 5 <sup>[e]</sup> | dppb                              | >99                            | 98 : 2 : 0                                                   |
| 6                | dpppe                             | 7                              | 100 : 0 : 0                                                  |
| 7                | <i>rac</i> -BINAP                 | trace                          | —                                                            |
| 8                | P( <sup>n</sup> Bu) <sub>3</sub>  | 57                             | 11 : 7 : 82                                                  |
| 9                | P( <sup>n</sup> Oct) <sub>3</sub> | 71                             | 11 : 21 : 68                                                 |

<sup>[a]</sup> Reaction conditions: **1a** 1.0 mmol, **2a** 1.3 mmol, toluene 1.0 cm<sup>3</sup>, 2.0 wt% Ru/CeO<sub>2</sub> catalyst 125 mg (0.025 mmol as Ru, prepared from Ru(acac)<sub>3</sub>), phosphine 0.050 mmol, at 80 °C for 24 h under Ar.

<sup>[b]</sup> Ru/CeO<sub>2</sub> and phosphine were pretreated at 100 °C for 20 min under H<sub>2</sub> (1 atm).

<sup>[c]</sup> Total yield of **3aa** and **4aa** based on **1a**, determined by GLC.

<sup>[d]</sup> Molar ratio of isomers determined by GLC.

<sup>[e]</sup> Reaction time, 8 h.

### 3. Effects of the procedure for recycling of the dppb-Ru/CeO<sub>2</sub> catalyst on the activity.

The activities of recovered dppb-modified Ru/CeO<sub>2</sub> catalysts regenerated by various methods were examined. Table S3 shows the regeneration procedure and the activity of the recycled catalyst. The recovered dppb-modified Ru/CeO<sub>2</sub> catalyst, which had given vinyl esters **3a** in a yield of 99% in the first catalytic run, was used in the second run after thorough washing with diethyl ether (10 cm<sup>3</sup>, 3 times) followed by overnight drying in air at 80 °C. The total yield of **3a** in the second use was low, 24% (entry 1), probably because of the loss of most of the dppb ligand from the solid surface during washing. As shown in entry 2, reductive treatment of the washed catalyst in H<sub>2</sub> together with dppb increased its activity to give vinyl esters in a total yield of 40% with high selectivity for the *Z*-isomer of **3aa**. On the other hand, calcination of the washed catalyst in air at 400 °C for 30 min completely changed the product selectivity. As noted in entry 3, the total yield of vinyl esters was 40% and the *E*-isomer of **3aa** was produced as a major product with 70% selectivity. This selectivity is very similar to that with the fresh unmodified Ru/CeO<sub>2</sub> catalyst (entry 2 of Table 1), probably because calcination removes dppb from the coordination sites of ruthenium. Finally, the recycled catalyst, which was re-modified by dppb after thorough washing and subsequent calcination in air at 400 °C for 30 min, selectively afforded the *Z*-isomer of **3aa** in a high yield (total yield 99%), indicating that Ru/CeO<sub>2</sub> can be repeatedly used without a loss of effectiveness after a suitable regeneration procedure. Although a decreased amount of the Ru/CeO<sub>2</sub> catalyst was used, the *Z*-isomer of **3aa** was also obtained in a high yield and selectivity in the 3<sup>rd</sup> catalytic run.

**Table S3.** Recycling of the dppb-modified Ru/CeO<sub>2</sub> catalyst.<sup>[a,b]</sup>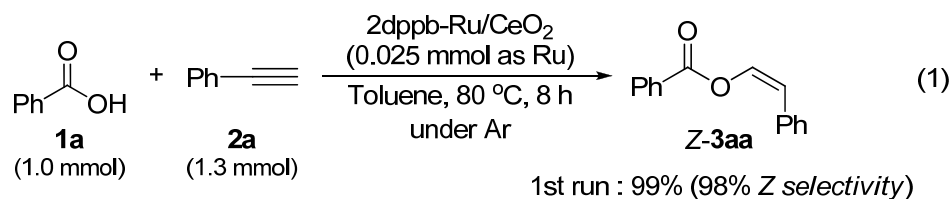

| Entry            | Recycling procedures                               | Catalyst                           | Total yield (%) <sup>[c]</sup> | Selectivity (%) <sup>[d]</sup><br><i>Z-3aa</i> : <i>E-3aa</i> : <i>4aa</i> |
|------------------|----------------------------------------------------|------------------------------------|--------------------------------|----------------------------------------------------------------------------|
| 1                | Washing + drying                                   | 2 <sup>nd</sup> use                | 24                             | 98 : 2 : 0                                                                 |
| 2 <sup>[e]</sup> | Washing + drying + dppb modification               | 2 <sup>nd</sup> use                | 40                             | 98 : 2 : 0                                                                 |
| 3 <sup>[e]</sup> | Washing + drying + calcination                     | 2 <sup>nd</sup> use                | 40                             | 20 : 75 : 5                                                                |
| 4                | Washing + drying + calcination + dppb modification | 2 <sup>nd</sup> use <sup>[f]</sup> | 99                             | 98 : 2 : 0                                                                 |
| 5                | Washing + drying + calcination + dppb modification | 3 <sup>rd</sup> use <sup>[g]</sup> | 94                             | 98 : 2 : 0                                                                 |

<sup>[a]</sup> Reaction conditions: **1a** 1.0 mmol, **2a** 1.3 mmol, toluene 1.0 cm<sup>3</sup>, Ru/CeO<sub>2</sub> catalyst 125 mg (0.025 mmol as Ru, prepared from Ru(acac)<sub>3</sub>), dppb 0.050 mmol, at 80 °C for 8 h under Ar.

<sup>[b]</sup> Ru/CeO<sub>2</sub> and dppb were pretreated at 100 °C for 20 min under H<sub>2</sub> (1 atm).

<sup>[c]</sup> Total yield of **3aa** and **4aa** based on **1a**, determined by GLC.

<sup>[d]</sup> Molar ratio of isomers determined by GLC.

<sup>[e]</sup> Reaction time, 24 h.

<sup>[f]</sup> Recovered catalyst, 113 mg.

<sup>[g]</sup> Recovered catalyst, 97 mg from entry 4.

#### 4. Examination of the surface of Ru/CeO<sub>2</sub> catalyst by an XPS study.

The composition of the surface of the catalyst after the catalytic run and re-calcination was monitored by X-ray photoelectron spectroscopy (XPS). Due to the high volatility of phosphines, the spectrum just after phosphine-modification was not recorded. As summarized in Table S4, most of the surface of the used catalyst after thorough washing at room temperature was covered with carbonaceous materials. The amount of phosphorous species on the surface was small, 0.38 atom %, indicating that most of the phosphorous species was eliminated by washing. Note that the possible sublimation of phosphines during evacuation prior to the XPS study should be taken into account. After re-calcination, most of the surface carbonaceous species and remaining phosphorous species were eliminated. The surface ratio of ruthenium species was almost unchanged before and after the catalytic run and the subsequent regeneration procedure. Ru 3d<sub>5/2</sub> peaks appeared at around 281 eV in all cases shown in Table S4, but it was difficult to precisely estimate the binding energies due to severe overlapping with the C 1s peaks.

**Table S4.** XPS analysis of the Ru(2.0 wt%)/CeO<sub>2</sub> catalyst prepared from Ru(acac)<sub>3</sub>.<sup>[a]</sup>

| Remarks                                                          | C<br>(%) | Ru<br>(%) | P<br>(%) | Ce<br>(%) | O<br>(%) |
|------------------------------------------------------------------|----------|-----------|----------|-----------|----------|
| fresh catalyst                                                   | 21.59    | 1.09      | none     | 22.67     | 54.65    |
| after 1 <sup>st</sup> use, washed <sup>[b]</sup>                 | 41.28    | 0.98      | 0.38     | 13.63     | 43.73    |
| after 1 <sup>st</sup> use, washed and re-calcined <sup>[c]</sup> | 22.39    | 1.00      | trace    | 21.76     | 54.79    |

<sup>[a]</sup> Surface concentrations are shown as atomic %, measured at room temperature.

<sup>[b]</sup> Washed three time with diethyl ether (5 cm<sup>3</sup>) at room temperature.

<sup>[c]</sup> Calcined at 400 °C for 30 min in air.

## 5. DRIFT spectra of Ru/CeO<sub>2</sub> catalyst before and after dppb-modification.

Figure S1 shows changes in the diffuse reflectance infrared Fourier transform (DRIFT) spectrum of the Ru/CeO<sub>2</sub> catalyst prepared using Ru(acac)<sub>3</sub> followed by dppb-modification. Whereas fresh Ru/CeO<sub>2</sub> showed a band at 975 cm<sup>-1</sup> characteristic of the surface Ru=O species,<sup>[1-3]</sup> such a band was not detected in the spectra of the dppb-modified catalyst or the used catalyst, which reflected the absence of Ru=O species. Note that dppb shows absorption bands at 845, 905, 995, 1025, 1065, and 1095 cm<sup>-1</sup>. The spectrum of the used catalyst also showed significant bands probably due to adsorbed organic materials, mainly dppb.

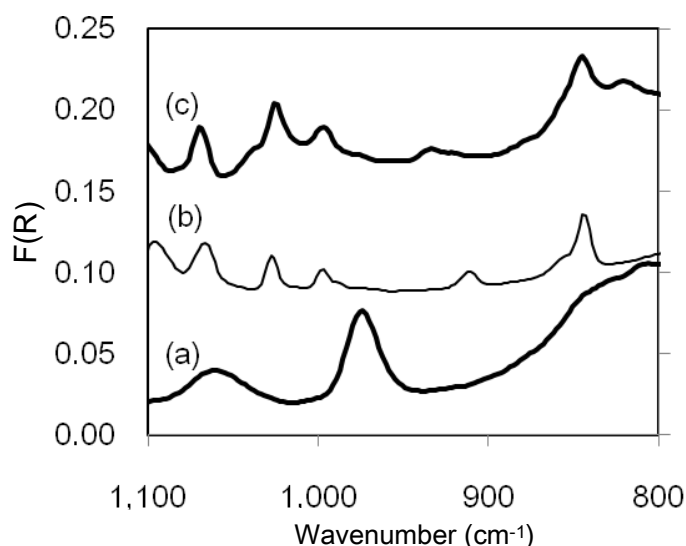

**Figure S1** DRIFT spectra of Ru/CeO<sub>2</sub> catalysts prepared using Ru(acac)<sub>3</sub> as a precursor. (a) Fresh, (b) dppb-modified, and (c) used catalyst.

## 6. Effects of reaction temperatures, additives, and the amount of $P(^n\text{Oct})_3$ on the reaction using $P(^n\text{Oct})_3$ -modified Ru/CeO<sub>2</sub> catalyst.

As shown in entries 1 to 3 of Table S5, a reaction temperature of around 120 °C was found to be the most suitable for the reactions of **1a** and **2a** over the  $P(^n\text{Oct})_3$ -modified Ru/CeO<sub>2</sub> catalyst (prepared from Ru(acac)<sub>3</sub>). The effects of various additives are also summarized in Table S5. The addition of 0.10 mmol (4 eq. to Ru) of NH<sub>4</sub>Cl was found to be suitable in terms of both the yield of vinyl esters and the selectivity of **4aa**. The addition of a larger or smaller amount of NH<sub>4</sub>Cl decreased the total yield and the selectivity of **4aa**.

**Table S5.** Effects of reaction temperature and additives on the reaction catalyzed by  $P(^n\text{Oct})_3$ -modified Ru/CeO<sub>2</sub>.<sup>[a,b]</sup>

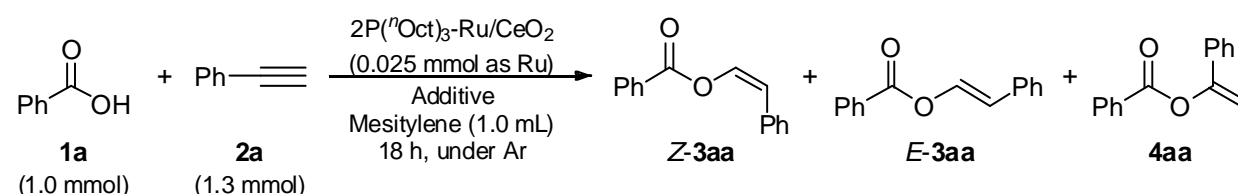

| Entry            | Additive (mmol)            | Reaction temp. (°C) | Total yield (%) <sup>[c]</sup> | Selectivity (%) <sup>[d]</sup><br>Z-3aa : E-3aa : 4aa |
|------------------|----------------------------|---------------------|--------------------------------|-------------------------------------------------------|
| 1 <sup>[e]</sup> | None                       | 80                  | 71                             | 11 : 21 : 68                                          |
| 2 <sup>[e]</sup> | None                       | 120                 | 99                             | 26 : 27 : 47                                          |
| 3 <sup>[e]</sup> | None                       | 140                 | 81                             | 31 : 7 : 62                                           |
| 4                | KI (0.10)                  | 120                 | 92                             | 28 : 33 : 39                                          |
| 5                | KBr (0.10)                 | 120                 | 99                             | 26 : 15 : 59                                          |
| 6                | KCl (0.10)                 | 120                 | 99                             | 24 : 11 : 65                                          |
| 7                | LiCl (0.10)                | 120                 | 92                             | 28 : 50 : 22                                          |
| 8                | NaCl (0.10)                | 120                 | 83                             | 19 : 6 : 75                                           |
| 9 <sup>[f]</sup> | NH <sub>4</sub> Cl (0.10)  | 120                 | >99                            | 15 : 8 : 77                                           |
| 10               | NH <sub>4</sub> Cl (0.050) | 120                 | 69                             | 29 : 28 : 43                                          |
| 11               | NH <sub>4</sub> Cl (0.20)  | 120                 | 82                             | 15 : 21 : 64                                          |
| 12               | NH <sub>4</sub> Cl (0.40)  | 120                 | 88                             | 39 : 20 : 41                                          |
| 13               | Bu <sub>4</sub> NCl(0.10)  | 120                 | 97                             | 9 : 30 : 61                                           |

<sup>[a]</sup> Reaction conditions: **1a** 1.0 mmol, **2a** 1.3 mmol, mesitylene 1.0 cm<sup>3</sup>, 2.0 wt% Ru/CeO<sub>2</sub> catalyst 125 mg (0.025 mmol as Ru, prepared from Ru(acac)<sub>3</sub>),  $P(^n\text{Oct})_3$  0.050 mmol, for 18 h under Ar.

<sup>[b]</sup> Ru/CeO<sub>2</sub> and  $P(^n\text{Oct})_3$  were pretreated at 100 °C for 20 min under H<sub>2</sub> (1 atm).

<sup>[c]</sup> Total yield of **3aa** and **4aa** based on **1a**, determined by GLC.

<sup>[d]</sup> Molar ratio of isomers determined by GLC.

<sup>[e]</sup> Reaction time, 24 h.

<sup>[f]</sup> Reaction time, 6 h.



As shown in Table S6, the optimum P(<sup>n</sup>Oct)<sub>3</sub>/Ru molar ratio was found to be 2.

**Table S6.** Effect of the amount of P(<sup>n</sup>Oct)<sub>3</sub> on the Markovnikov addition<sup>[a]</sup>

| Entry            | <i>x</i> <sup>[b]</sup> | Total yield (%) <sup>[c]</sup> | Selectivity (%) <sup>[d]</sup><br>Z- <b>3aa</b> : E- <b>3aa</b> : <b>4aa</b> |
|------------------|-------------------------|--------------------------------|------------------------------------------------------------------------------|
| 1                | 1                       | 61                             | 15 : 28 : 57                                                                 |
| 2 <sup>[e]</sup> | 2                       | >99                            | 15 : 8 : 77                                                                  |
| 3                | 3                       | 59                             | 16 : 15 : 69                                                                 |
| 4                | 4                       | 17                             | 17 : 12 : 71                                                                 |

<sup>[a]</sup> Reaction conditions: **1a** 1.0 mmol, **2a** 1.3 mmol, solvent 1.0 cm<sup>3</sup>, Ru/CeO<sub>2</sub> catalyst 0.025 mmol as Ru, NH<sub>4</sub>Cl 0.10 mmol, at 120 °C for 24 h under Ar.

<sup>[b]</sup> *x* = P(<sup>n</sup>Oct)<sub>3</sub>/Ru (molar ratio).

<sup>[c]</sup> Based on **1a**, determined by GLC.

<sup>[d]</sup> Molar ratio of isomers determined by GLC.

<sup>[e]</sup> Reaction time, 6 h.

Table S7 shows the effects of Ru precursors used for the preparation of Ru/CeO<sub>2</sub>. The reaction in the presence of Ru/CeO<sub>2</sub> prepared using Ru complexes with chlorido ligands or RuCl<sub>3</sub> · *n*H<sub>2</sub>O showed higher selectivity for the Markovnikov adducts.

**Table S7.** Effects of Ru precursors of Ru/CeO<sub>2</sub> on Markovnikov addition<sup>[a]</sup>

| Entry            | Ru precursor                                         | Total yield (%) <sup>[b]</sup> | Selectivity (%) <sup>[c]</sup><br>Z- <b>3aa</b> : E- <b>3aa</b> : <b>4aa</b> |
|------------------|------------------------------------------------------|--------------------------------|------------------------------------------------------------------------------|
| 1 <sup>[d]</sup> | Ru(acac) <sub>3</sub>                                | >99                            | 27 : 26 : 47                                                                 |
| 2                | Ru <sub>3</sub> (CO) <sub>12</sub>                   | >99                            | 15 : 26 : 59                                                                 |
| 3                | RuCl <sub>3</sub> · <i>n</i> H <sub>2</sub> O        | 79                             | 9 : 13 : 78                                                                  |
| 4                | [RuCl <sub>2</sub> ( <i>p</i> -cymene)] <sub>2</sub> | 99                             | 23 : 16 : 61                                                                 |
| 5                | [RuCl <sub>2</sub> (CO) <sub>3</sub> ] <sub>2</sub>  | 99                             | 13 : 16 : 71                                                                 |

<sup>[a]</sup> Reaction conditions: **1a** 1.0 mmol, **2a** 1.3 mmol, solvent 1.0 cm<sup>3</sup>, Ru/CeO<sub>2</sub> catalyst 0.025 mmol as Ru, at 120 °C for 18 h under Ar.

<sup>[b]</sup> Based on **1a**, determined by GLC.

<sup>[c]</sup> Molar ratio of isomers determined by GLC.

<sup>[d]</sup> Reaction time, 24 h.

## 7. Effects of solvent on the reaction using P(<sup>n</sup>Oct)<sub>3</sub>-modified Ru/CeO<sub>2</sub> catalyst.

As shown in Table S8, aromatic solvents such as mesitylene, xylene, or toluene were found to be suitable. In polar solvents, the reaction did not proceed at all.

**Table S8.** Effect of solvent on the reaction using P(<sup>n</sup>Oct)<sub>3</sub>-modified Ru/CeO<sub>2</sub> <sup>[a,b]</sup>

| Entry            | Solvent                         | Total yield (%) <sup>[c]</sup> | Selectivity (%) <sup>[d]</sup><br>Z- <b>3aa</b> : E- <b>3aa</b> : <b>4aa</b> |
|------------------|---------------------------------|--------------------------------|------------------------------------------------------------------------------|
| 1 <sup>[e]</sup> | Mesitylene                      | >99                            | 15 : 8 : 77                                                                  |
| 2 <sup>[f]</sup> | Toluene                         | 56                             | 13 : 12 : 75                                                                 |
| 3                | <i>o</i> -Xylene                | 50                             | 12 : 12 : 76                                                                 |
| 4                | 1-Methyl-2-pyrrolidone          | 0                              | —                                                                            |
| 5                | <i>N,N</i> -Dimethylformamide   | 0                              | —                                                                            |
| 6                | <i>N,N</i> -Dimethylacetamide   | 0                              | —                                                                            |
| 7 <sup>[g]</sup> | CH <sub>2</sub> Cl <sub>2</sub> | 0                              | —                                                                            |

<sup>[a]</sup> Reaction conditions: **1a** 1.0 mmol, **2a** 1.3 mmol, solvent 1.0 cm<sup>3</sup>, 2.0 wt% Ru/CeO<sub>2</sub> catalyst 125 mg (0.025 mmol as Ru, prepared from Ru(acac)<sub>3</sub>), P(<sup>n</sup>Oct)<sub>3</sub> 0.050 mmol, NH<sub>4</sub>Cl 0.10 mmol, at 120 °C for 18 h under Ar.

<sup>[b]</sup> Ru/CeO<sub>2</sub> and P(<sup>n</sup>Oct)<sub>3</sub> were pretreated at 100 °C for 20 min under H<sub>2</sub> (1 atm).

<sup>[c]</sup> Total yield of **3aa** and **4aa** based on **1a**, determined by GLC.

<sup>[d]</sup> Molar ratio of isomers determined by GLC.

<sup>[e]</sup> Reaction time, 6 h.

<sup>[f]</sup> Reaction temp., 100 °C.

<sup>[g]</sup> Bath temp., 90 °C; reaction time, 8 h.

#### 8. $^{31}\text{P}\{^1\text{H}\}$ NMR study of the reaction mixture.

After the catalytic run shown in entry 9 of Table 1, the used dppb-modified Ru/CeO<sub>2</sub> catalyst was removed from the reaction mixture by cannula filtration (using No. 2 filter paper) at room temperature and then washed with toluene (5 cm<sup>3</sup>, three times). The combined filtrate and washings were condensed by evaporation and then subjected to  $^{31}\text{P}\{^1\text{H}\}$  NMR measurement (161.9 MHz, in CDCl<sub>3</sub> at room temperature) with or without a known amount of OP(OPh)<sub>3</sub> as an internal standard. In the spectrum, there is a large singlet at -16.5 ppm due to dppb together with very small peaks of intractable phosphorous compounds. Similarly the  $^{31}\text{P}\{^1\text{H}\}$  NMR spectrum of washings of 2dppb-Ru/CeO<sub>2</sub> after heating in toluene (1.0 cm<sup>3</sup>) for 8 h without any substrates showed only a distinct peak due to dppb without any sign of other products, indicating that 91% of the dppb used for modification remained unchanged in the solution.

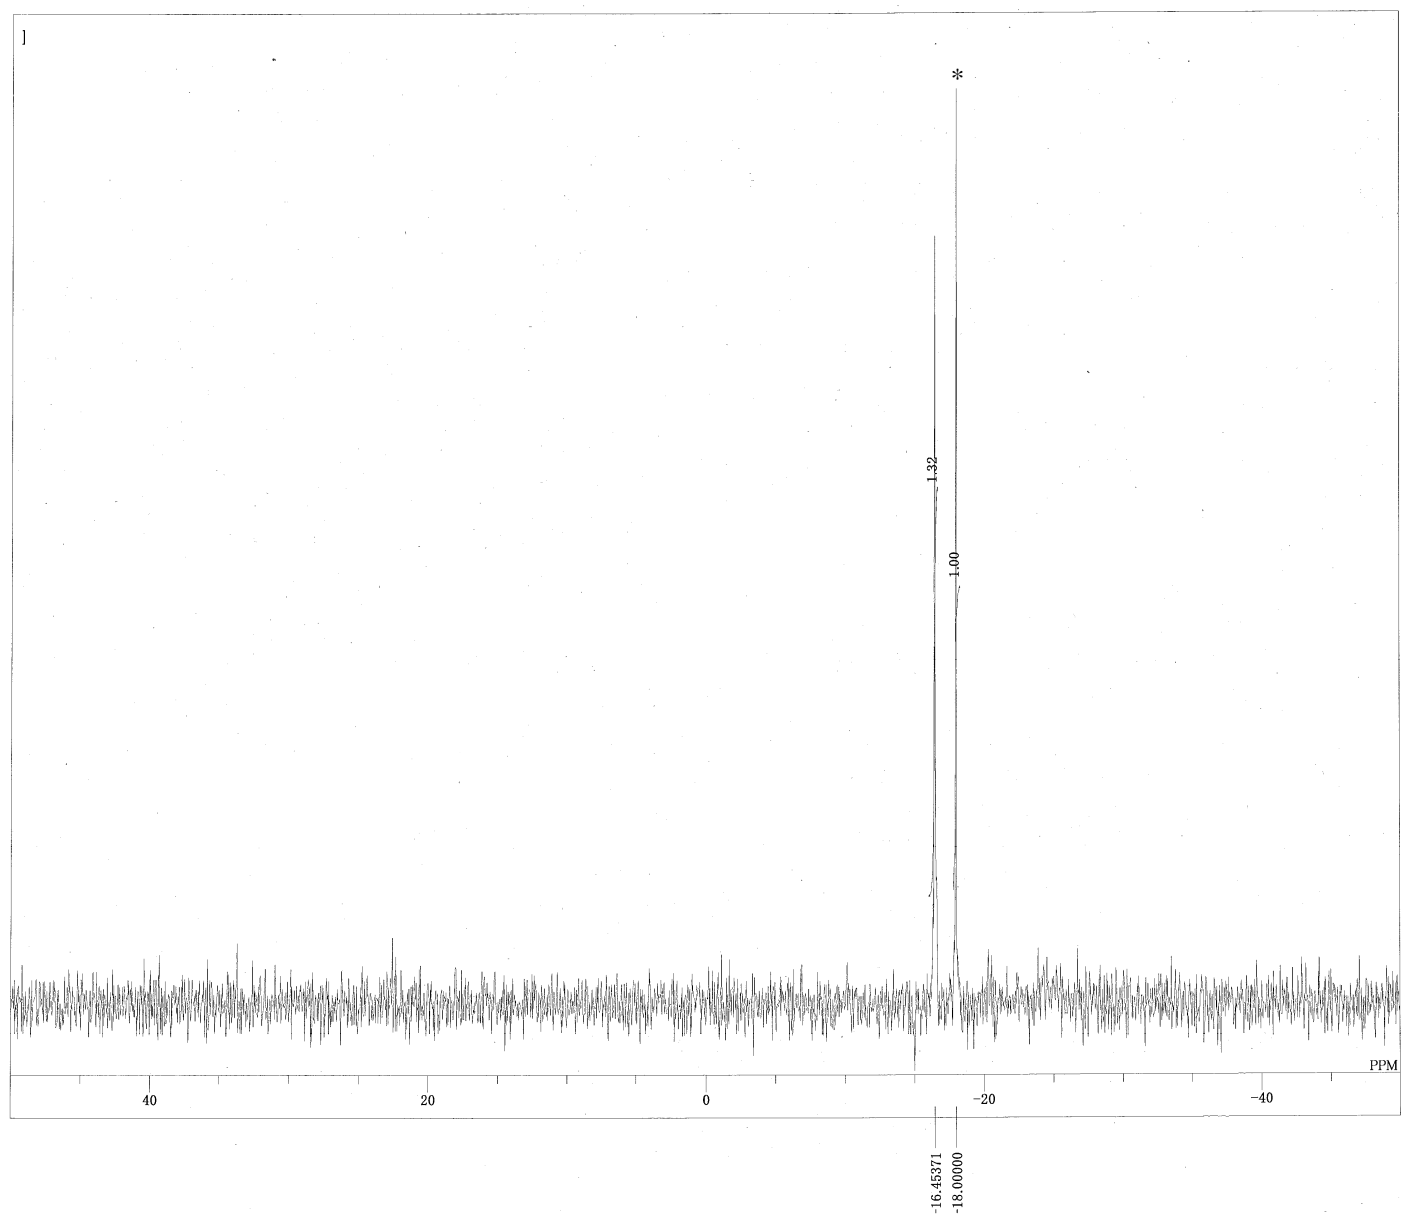

**Figure S2.**  $^{31}\text{P}$  { $^1\text{H}$ } NMR spectrum of the combined filtrate and washings. A peak marked with \* is that of  $\text{OP}(\text{OPh})_3$ .

**Z-3ca**

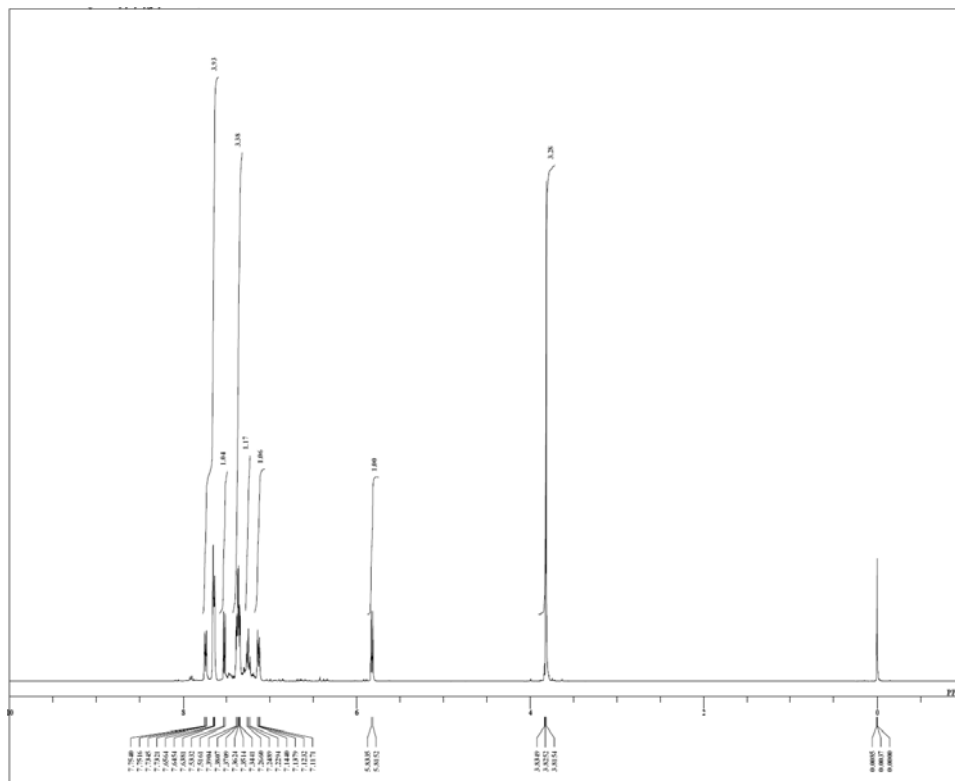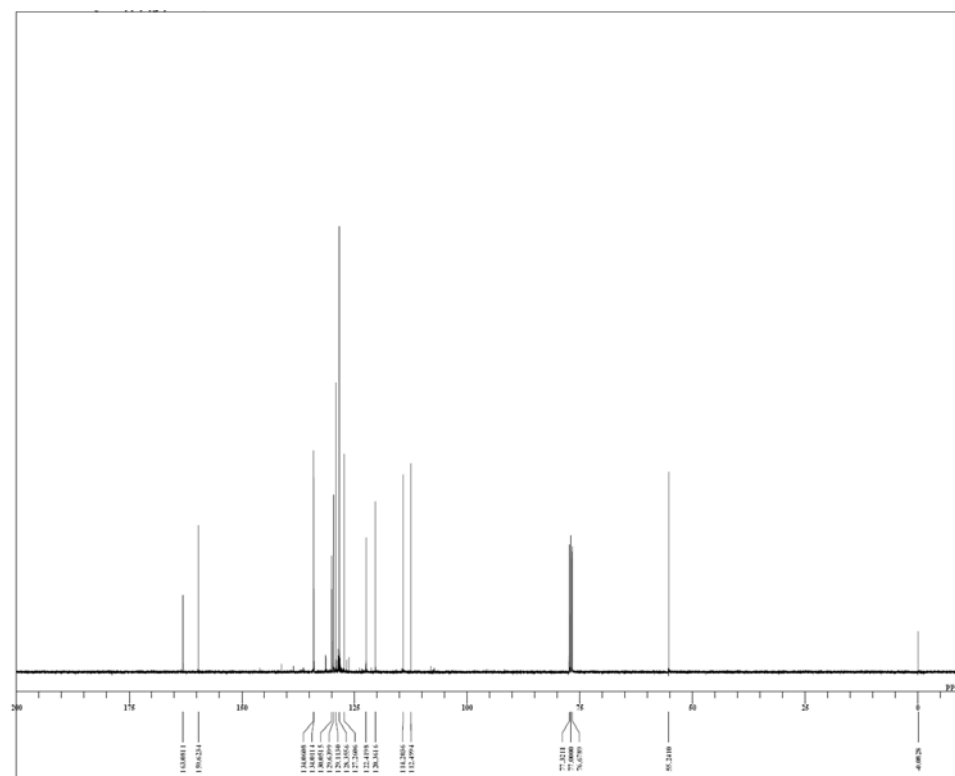

Z-3da

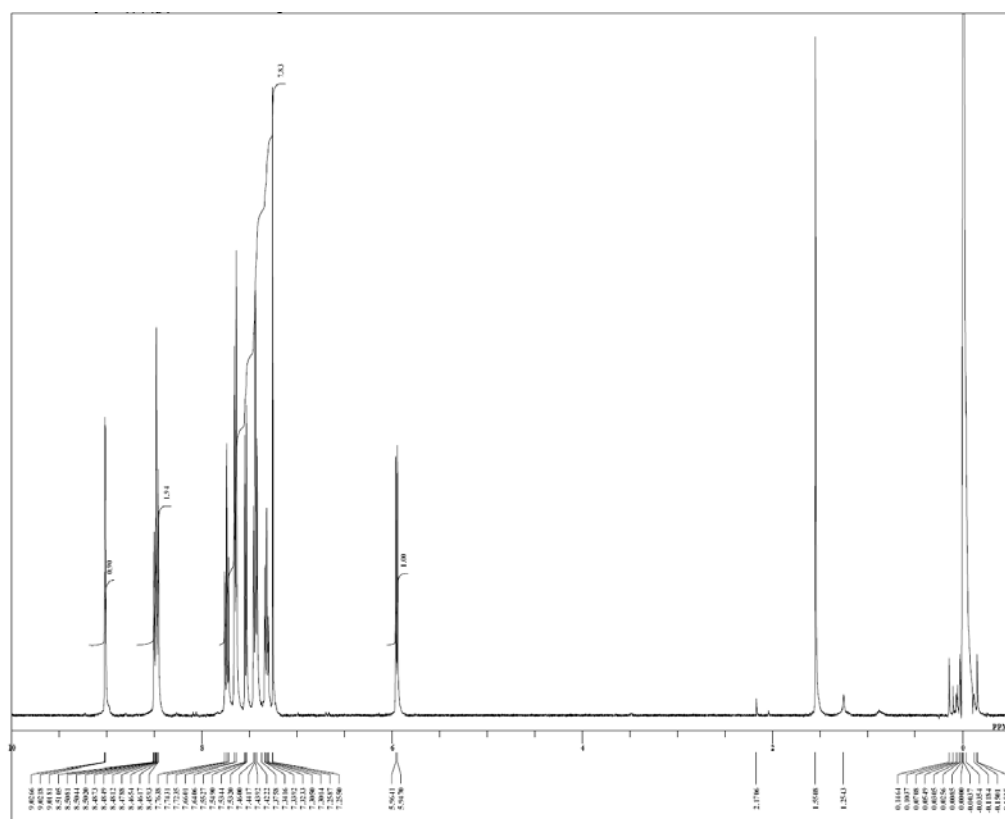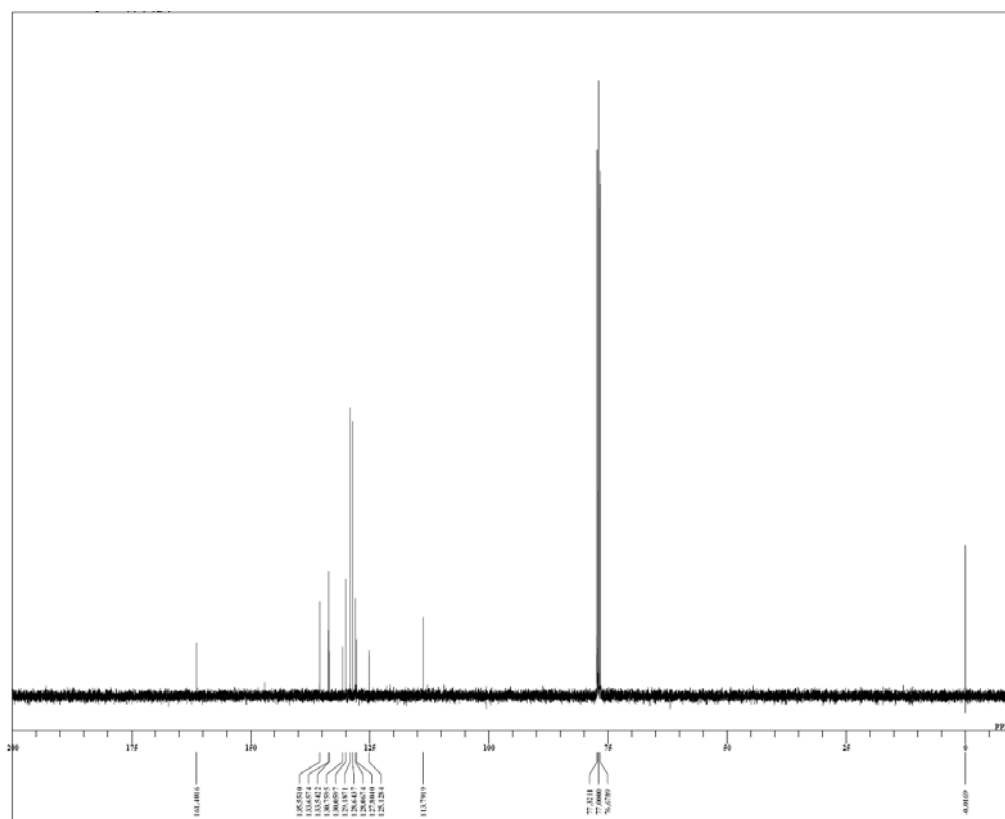

S14

Z-3ea

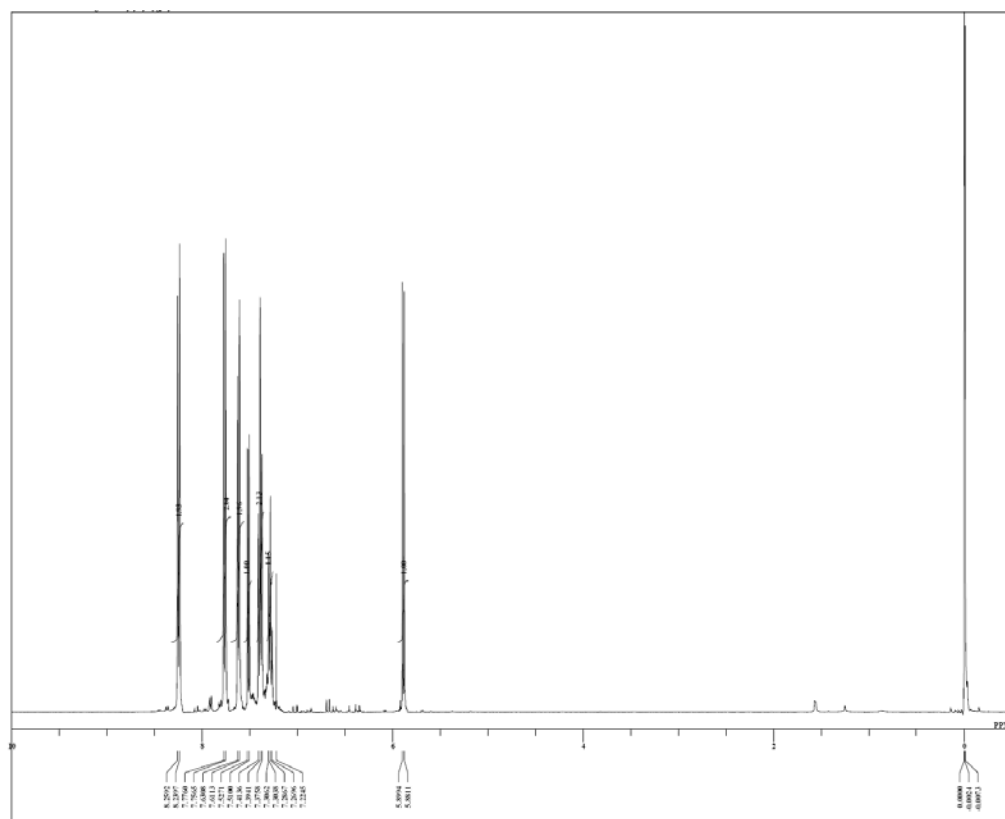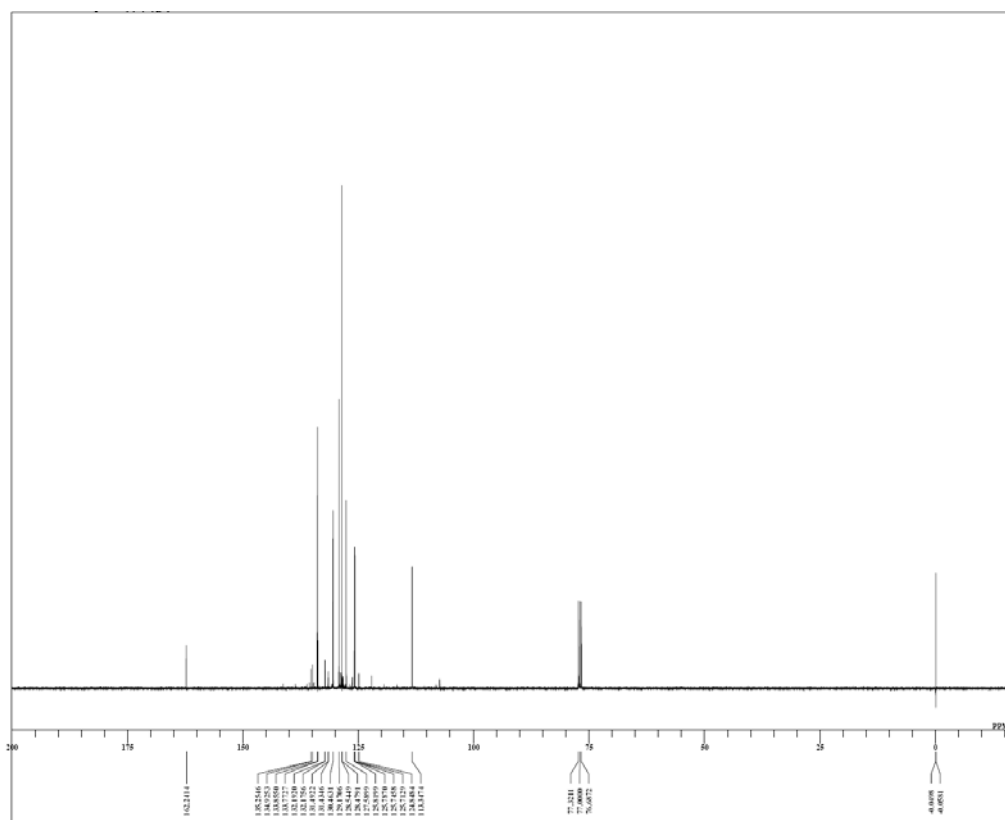

Z-3fa

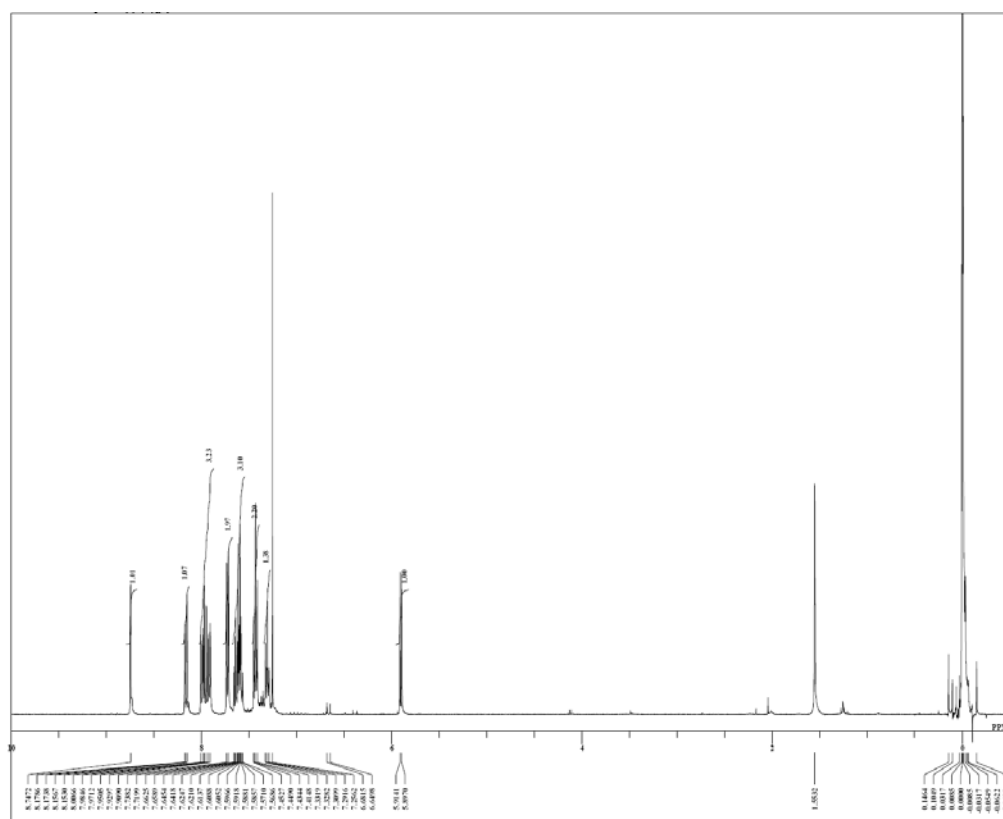



# Z-3ha

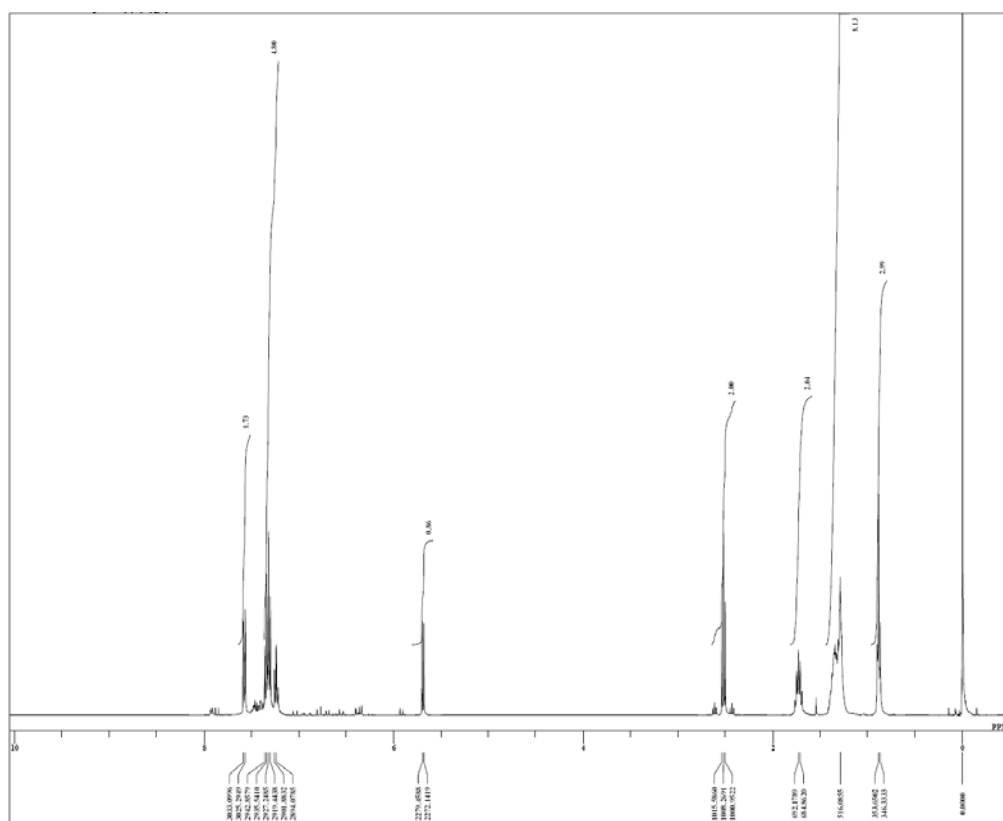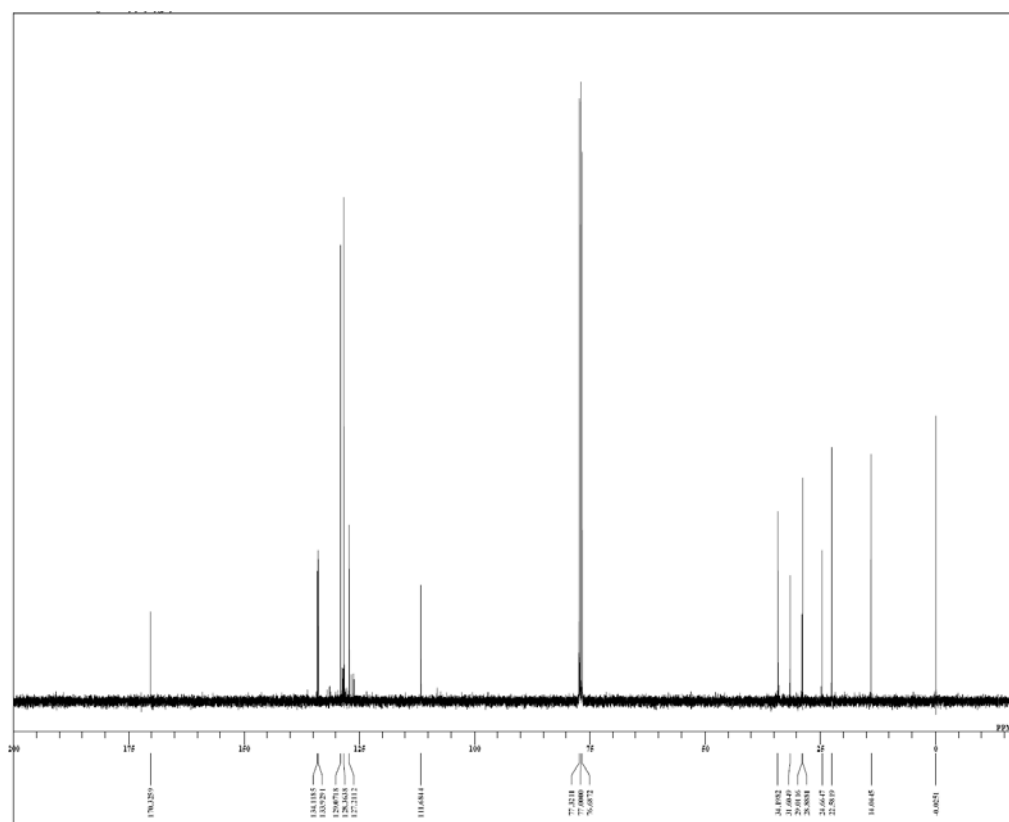

**Z-3ad**

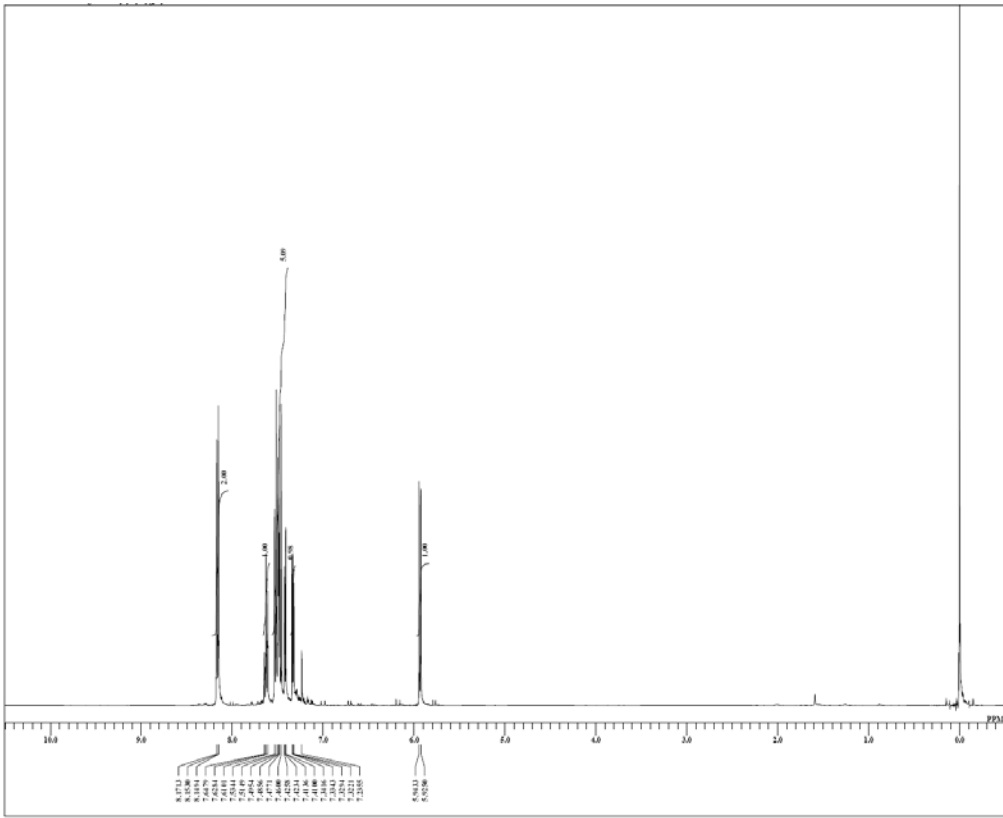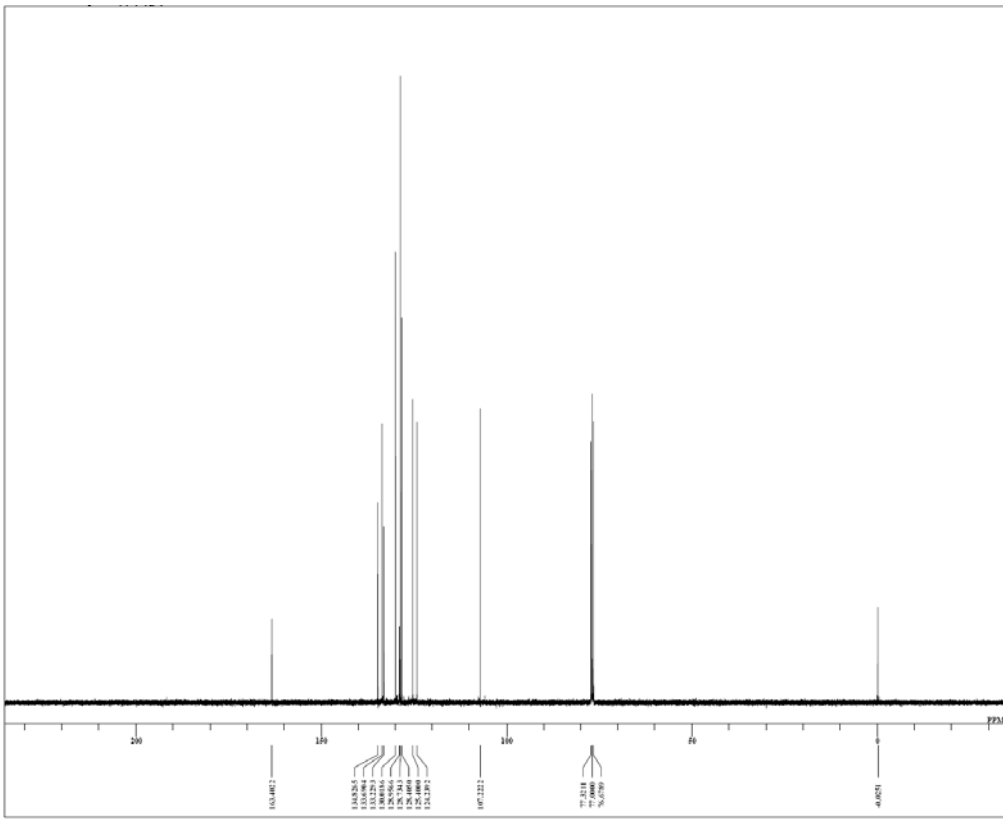

**4da, E-3da and Z-3da (91:4:5)**

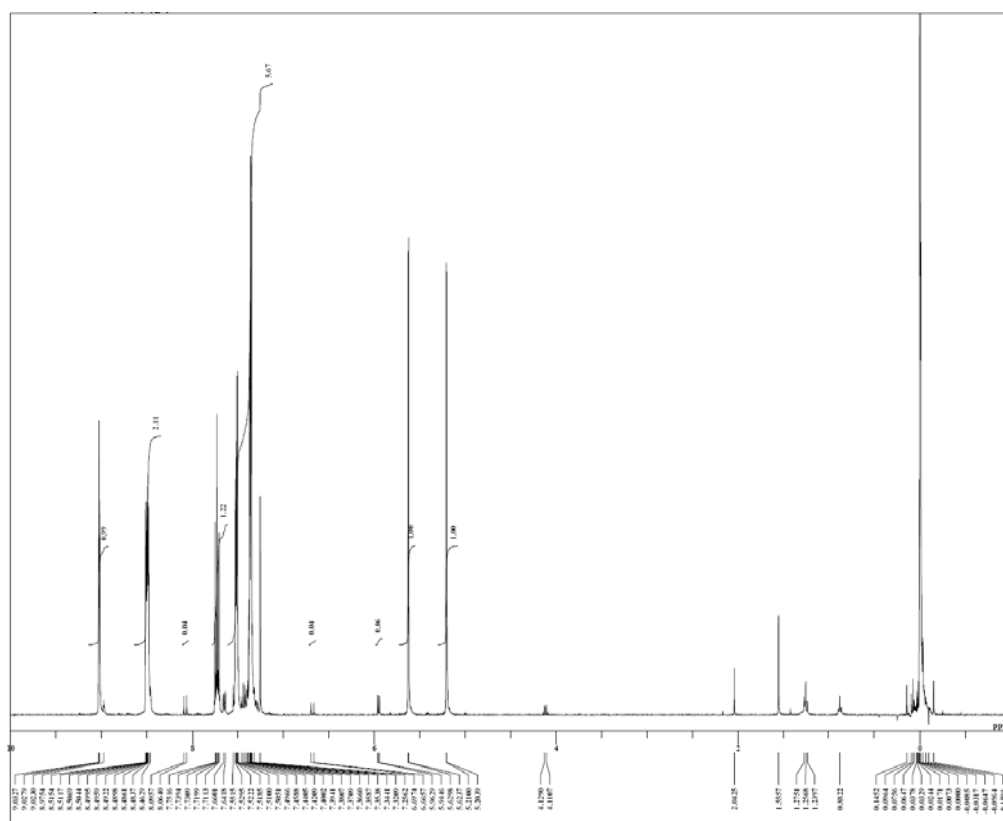

## 9. References

- (1) (a) Miura, H.; Wada, K. ; Hosokawa, S.; Sai, M.; Kondo, T.; Inoue, M. *Chem. Commun.* **2009**, 4112–4114.  
(b) Miura, H.; Wada, K. ; Hosokawa, S.; Inoue, M. *Chem. Eur. J.* **2010**, *16*, 4186–4189. (c) Miura, H.;  
Wada, K. ; Hosokawa, S.; Inoue, M. *ChemCatChem* **2010**, *2*, 1223–1225.
- (2) Nishiumi, M.; Miura, H.; Wada, K. ; Hosokawa, S.; Inoue, M. *Adv. Synth. Catal.* **2010**, *352*, 3045–3052.
- (3) Hosokawa, S.; Nogawa, S., Taniguchi, M.; Utani, K.; Kanai, H.; Imamura, S. *Appl. Catal. A General* **2005**, *288*, 67–73.
